# Supplementary material for: The bereavement experience of people who have recovered from corona is a risk and protective factor: a qualitative study
Source: Research Square preprint supplement (doi:10.21203/rs.3.rs-7921286/v1), 2026-01-16
Supplement: Supplementary file 1 [file a4bbd93c44eb3b822e0b0e64.docx]

Appendix

Interview questions

1. How would you describe the coronavirus?

2. How did you experience the grief caused by the coronavirus?

3. What aspects of your life were affected by the coronavirus?

4. What part of the reality of the coronavirus bothered you most?

5. How much support did you receive from those around you emotionally, financially, and otherwise? Did you feel lonely?

6. What concerns did you have during and after your illness?

7. What helped you cope with the illness and death of your loved one?

8. What aspects of your life were affected by the death of your loved one?

9. What bothers you most about this death?

10. What did you do when you faced the coronavirus and the death of your loved one?

11. In what situations (time and place) was it most difficult for you to endure this illness and grief?

12. How did others react to you regarding the coronavirus and the death of your loved one? Did you feel that others empathized with you?

13. What changes occurred in your family life and relationships? What about your social relationships?

14. What did you expect from others when discussing the illness and death of your loved one?

15. What steps did you take to adapt to the new situation?

16. Did this illness and the death of your loved ones have any positive aspects for you?
